# Supplementary material for: Fragment-Based Ab Initio Molecular Dynamics Simulation for Combustion
Source: MDPI journal article supplement (doi:10.3390/molecules26113120), 2021-05-23
Supplement: s1 [file s1]

## Supporting Information

Article

# Fragment-Based Ab Initio Molecular Dynamics Simulation for Combustion

Liqun Cao <sup>1</sup>, Jinzhe Zeng <sup>2</sup>, Mingyuan Xu <sup>1</sup>, Chih-Hao Chin <sup>1</sup>, Tong Zhu <sup>1,3,\*</sup> and John Z. H. Zhang <sup>1,3,4,\*</sup>

<sup>1</sup> School of Chemistry and Molecular Engineering, Shanghai Engineering Research Center of Molecular Therapeutics & New Drug Development, East China Normal University, Shanghai 200062, China; caoliqun1994@163.com (L.C.); mingyuan\_xu2014@163.com (M.X.); zhjin@chem.ecnu.edu.cn (C.-H.C.)

<sup>2</sup> Department of Chemistry and Chemical Biology, Rutgers University, Piscataway, NJ 08854, USA; jinzhe.zeng@rutgers.edu

<sup>3</sup> NYU-ECNU Center for Computational Chemistry, NYU Shanghai, Shanghai 200062, China

<sup>4</sup> Department of Chemistry, New York University, New York, NY 10003, USA

\* Correspondence: tzhu@lps.ecnu.edu.cn (T.Z.); john.zhang@nyu.edu (J.Z.H.Z.); Tel.: +86-18801626247 (T.Z.); +86-2120596108 (J.Z.H.Z.)

### Boundary condition with Jacobi Coordinates

In theoretical chemistry, Jacobi coordinates are usually used to reduce degrees of freedoms in the calculation of polyatomic reactions. For the N-body problem, the Jacobi Coordinates can be written as

$$\mathbf{r}_j = \frac{1}{m_{0j}} \sum_{k=1}^j m_k \mathbf{x}_k - \mathbf{x}_{j+1} \quad (j = 1, 2, \dots, N-1) \quad (1)$$

$$\mathbf{r}_N = \frac{1}{m_{0N}} \sum_{k=1}^N m_k \mathbf{x}_k \quad (2)$$

$$m_{0j} = \sum_{k=1}^j m_k \quad (3)$$

where  $\mathbf{r}_j$  represents the relative distance between the atom  $j+1$  and the center of mass of the first  $j$  atoms;  $m_k$  represents the mass of atom  $k$ ;  $\mathbf{x}_k$  represents the coordinates of atom  $k$ ;  $\mathbf{r}_N$  represents the coordinate of the center of mass of  $N$  atoms;  $m_{0j}$  represents the total mass of the first  $j$  atoms.

According to the coordinates, we can derive the velocity

$$\mathbf{v}_j = \frac{1}{m_{0j}} \sum_{k=1}^j m_k \mathbf{v}_k - \mathbf{v}_{j+1} \quad (j = 1, 2, \dots, N-1) \quad (4)$$

$$\mathbf{v}_C = \frac{1}{m_{0N}} \sum_{k=1}^N m_k \mathbf{v}_k \quad (5)$$

$$m_{0j} = \sum_{k=1}^j m_k \quad (6)$$

Correspondingly,  $V_j$  represents the relative velocity between the atom  $j+1$  and the center of mass of the first  $j$  atoms;  $v_k$  represents the velocity of atom  $k$ ;  $V_C$  represents the velocity of the center of mass of  $N$  atoms.

Assume that the initial velocity is a row matrix

$$I_k = [v_1, v_2, v_3, \dots, v_k] \quad (7)$$

It can be converted to Jacobi velocity

$$\begin{bmatrix} V_1 \\ V_2 \\ V_3 \\ \vdots \\ V_C \end{bmatrix} = \begin{bmatrix} \frac{1}{m_1} & \frac{-1}{m_2} & 0 & \dots & 0 & 0 \\ \frac{m_1}{m_1+m_2} & \frac{m_2}{m_1+m_2} & -1 & 0 & \dots & 0 \\ \frac{m_1}{m_1+m_2+m_3} & \frac{m_2}{m_1+m_2+m_3} & \frac{m_3}{m_1+m_2+m_3} & -1 & 0 & 0 \\ \vdots & \vdots & \ddots & \ddots & \ddots & \vdots \\ \frac{m_1}{\sum_{k=1}^N m_k} & \frac{m_2}{\sum_{k=1}^N m_k} & \dots & \dots & \dots & \frac{m_k}{\sum_{k=1}^N m_k} \end{bmatrix} \begin{bmatrix} v_1 \\ v_2 \\ v_3 \\ \vdots \\ v_k \end{bmatrix} \quad (8)$$

Formula (8) can be simplified as

$$V = A \times I_k^T \quad (9)$$

We set a matrix

$$B = \begin{bmatrix} 1 & 0 & \dots & \dots & 0 \\ 0 & 1 & 0 & \dots & 0 \\ \vdots & 0 & \ddots & 0 & \vdots \\ \vdots & \vdots & 0 & 1 & 0 \\ 0 & \dots & \dots & 0 & -1 \end{bmatrix} \quad (10)$$

After collision, the velocity of the center of mass is reversed

$$\begin{bmatrix} V_1 \\ V_2 \\ V_3 \\ \vdots \\ -V_C \end{bmatrix} = B \times \begin{bmatrix} V_1 \\ V_2 \\ V_3 \\ \vdots \\ V_C \end{bmatrix} \quad (11)$$

Then we transform the Jacobi velocity back to atomic velocities in the Cartesian coordinates.

$$\begin{bmatrix} \mathbf{v}'_1 \\ \mathbf{v}'_2 \\ \mathbf{v}'_3 \\ \vdots \\ \mathbf{v}'_k \end{bmatrix} = \mathbf{A}^{-1} \times \begin{bmatrix} \mathbf{V}_1 \\ \mathbf{V}_2 \\ \mathbf{V}_3 \\ \vdots \\ -\mathbf{V}_C \end{bmatrix} \quad (12)$$

If we set

$$\mathbf{I}_k = [\mathbf{v}'_1, \mathbf{v}'_2, \mathbf{v}'_3, \dots, \mathbf{v}'_k] \quad (13)$$

Formula (12) can be simplified as

$$\mathbf{I}_k^T = \mathbf{A}^{-1} \times \mathbf{B} \times \mathbf{A} \times \mathbf{I}_k^T \quad (14)$$

Finally, we convert the atomic velocity  $\mathbf{v}_k$  to the velocity  $\mathbf{v}'_k$  when any atom of the molecule hits the boundary. In this way, the relative atomic velocities and the total kinetic energy of the system remain unchanged.

**Table S1.** Reaction energies calculated with MN15 in different basis sets (kcal/mol).

| Reaction                                                             | Reaction energies calculated with MN15 in different basis sets (kcal/mol) |            |              |
|----------------------------------------------------------------------|---------------------------------------------------------------------------|------------|--------------|
|                                                                      | 6-31G(d)                                                                  | 6-31G(d,p) | 6-31G++(d,p) |
| $\text{CH}_4 + \text{O}_2 \rightarrow \text{CH}_3 + \text{HO}_2$     | 59.02                                                                     | 59.06      | 62.17        |
| $\text{CH}_4 + \text{O} \rightarrow \text{CH}_3 + \text{OH}$         | -49.94                                                                    | -50.09     | -46.14       |
| $\text{CH}_3\text{O} \rightarrow \text{CH}_2\text{O} + \text{H}$     | 29.15                                                                     | 29.87      | 27.90        |
| $\text{CH}_2\text{O} + \text{H} \rightarrow \text{CHO} + \text{H}_2$ | -11.27                                                                    | -10.63     | -11.61       |
| $\text{CH}_2\text{O} \rightarrow \text{CHO} + \text{H}$              | 97.49                                                                     | 99.83      | 95.67        |

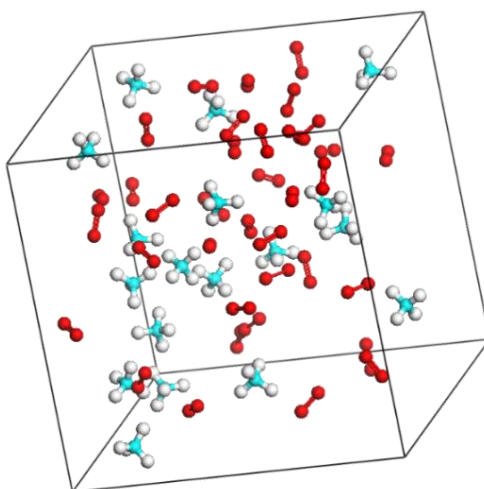

**Figure S1.** The initial structure of the methane-oxygen system.

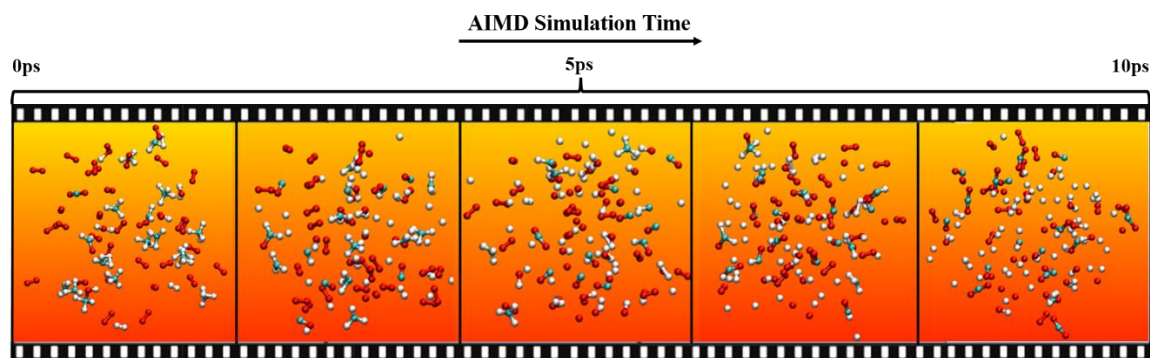

**Figure S2.** Typical snapshots in the FB-AIMD simulation trajectory. The white, cyan-blue, and red balls represent hydrogen, carbon, and oxygen atoms, respectively.

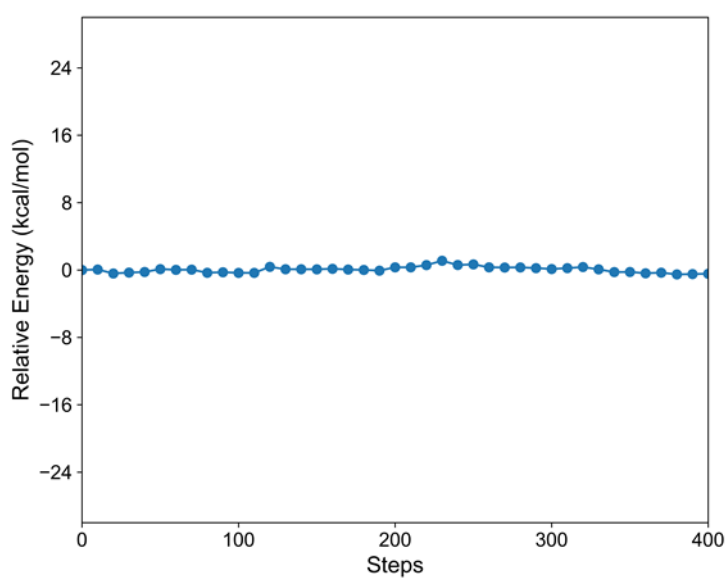

**Figure S3.** The relative total energy of the system during the simulation under the NVE ensemble.
